# Supplementary material
Source: PubMed Central journal article supplement (PMC7539558)
Supplement: NIHMS1628709-supplement-SM.pdf [file NIHMS1628709-supplement-SM.pdf]

**Physical Rehabilitation in Critically Ill Children: A Multicenter Point Prevalence  
Study in the United States**

**Supplementary Digital Content – Table of Contents**

Supplemental Digital Content (in order of presentation in text)

1. Additional Methodology for Statistical Analysis
2. Map of Participating PICU sites
3. Demographics of the 82 Participating PICUs
4. Study Flowchart
5. Proportion of Patients with PT and/or OT consultation request by Day 3 of PICU admission, by Baseline Pediatric Cerebral Performance Category
6. Patient Baseline Characteristics, separated by PT and OT-provided mobility
7. Patient Clinical Characteristics, separated by PT and OT-provided mobility
8. Multivariable Adjusted Odds Ratios for PT and/or OT-provided mobility (primary outcome), with separate analyses for PT and OT.
9. Univariate and Multivariable Adjusted Odds Ratios for Out-of-Bed Mobility
10. Frequency of Reported Barriers to Mobilization

### **SDC 1. Additional Details for Statistical Analysis**

We performed regression diagnostics including checks for collinearity of covariates and linear association of log-odds of outcomes with continuous variables. PICU LOS was log-transformed because it had a skewed distribution. After log-transformation, this variable had a U-shaped association with the study outcomes; thus, linear splines were included in the model at 100 days for therapist-provided mobility and at 10 days for out-of-bed mobility. We explored for statistical interaction of age with all covariates on the outcome of out-of-bed mobility. We included interaction terms if significant in the multivariable regression model at  $P < 0.05$ , and presented adjusted odds ratios (aORs) within two age strata:  $< 3$  or  $\geq 3$  years old. Missing data represented  $< 2\%$  for all variables in our primary analyses; therefore, we performed complete case analysis.

## SDC 2. Map of Participating PICU sites

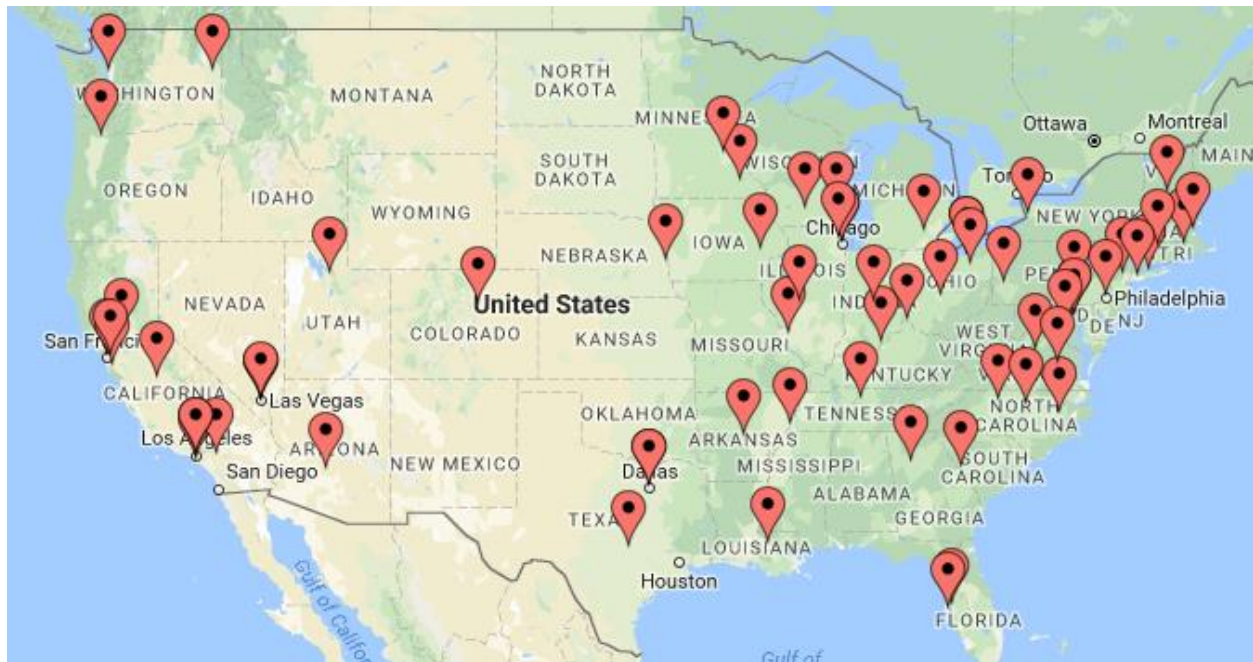

Each marker represents one hospital. N=49 hospitals with 1 participating ICU; N=15 hospitals with 2 participating ICUs; N=1 hospital with 3 participating ICUs

| <b>SDC 3. Demographics of the 82 Participating PICUs</b> |                       |                                     |
|----------------------------------------------------------|-----------------------|-------------------------------------|
| <b>Characteristic</b>                                    | <b>Value<br/>N=82</b> | <b># of patients (%)<br/>N=1769</b> |
| Number of PICU beds, median (IQR)                        | 24 (16 - 30)          | na                                  |
| Academic teaching hospital, n (%)                        | 75 (92)               | 1653 (93)                           |
| Free-standing children's hospital, n (%)                 | 45 (55)               | 1212 (69)                           |
| Type of PICU, n (%)                                      |                       |                                     |
| Medical-surgical with cardiac                            | 36 (44)               | 777 (44)                            |
| Medical-surgical without cardiac                         | 33 (40)               | 678 (38)                            |
| Cardiac only                                             | 13 (16)               | 374 (18)                            |
| All single-patient rooms, n (%)                          | 58 (71)               | 1207 (68)                           |
| Early mobility protocol, n (%)                           | 22 (27)               | 468 (27)                            |
| % dedicated FTE for PICU (IQR)                           |                       |                                     |
| Physical therapy                                         | 0.3 (0-0.7)           | na                                  |
| Occupational therapy                                     | 0.2 (0-0.5)           | na                                  |

IQR, Interquartile range; PICU, pediatric intensive care unit; FTE, full-time equivalent

**SDC 4. Study Flow Chart**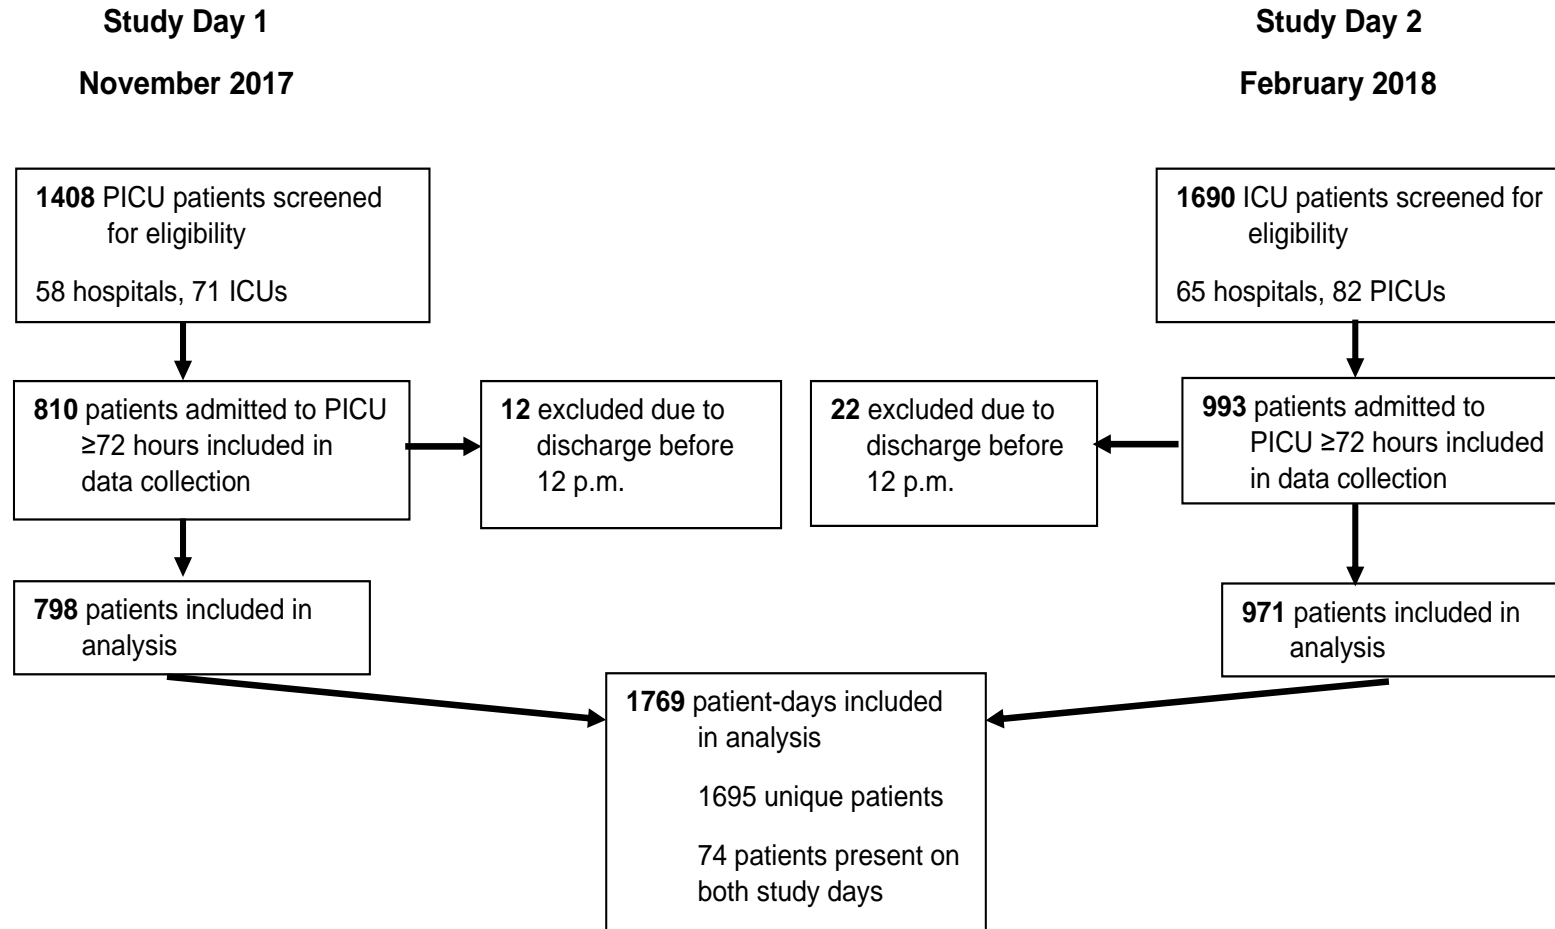

**SDC 5. Proportion of patients with PT or OT Consultation request by PICU Day 3, by baseline Pediatric Cerebral Performance Category**

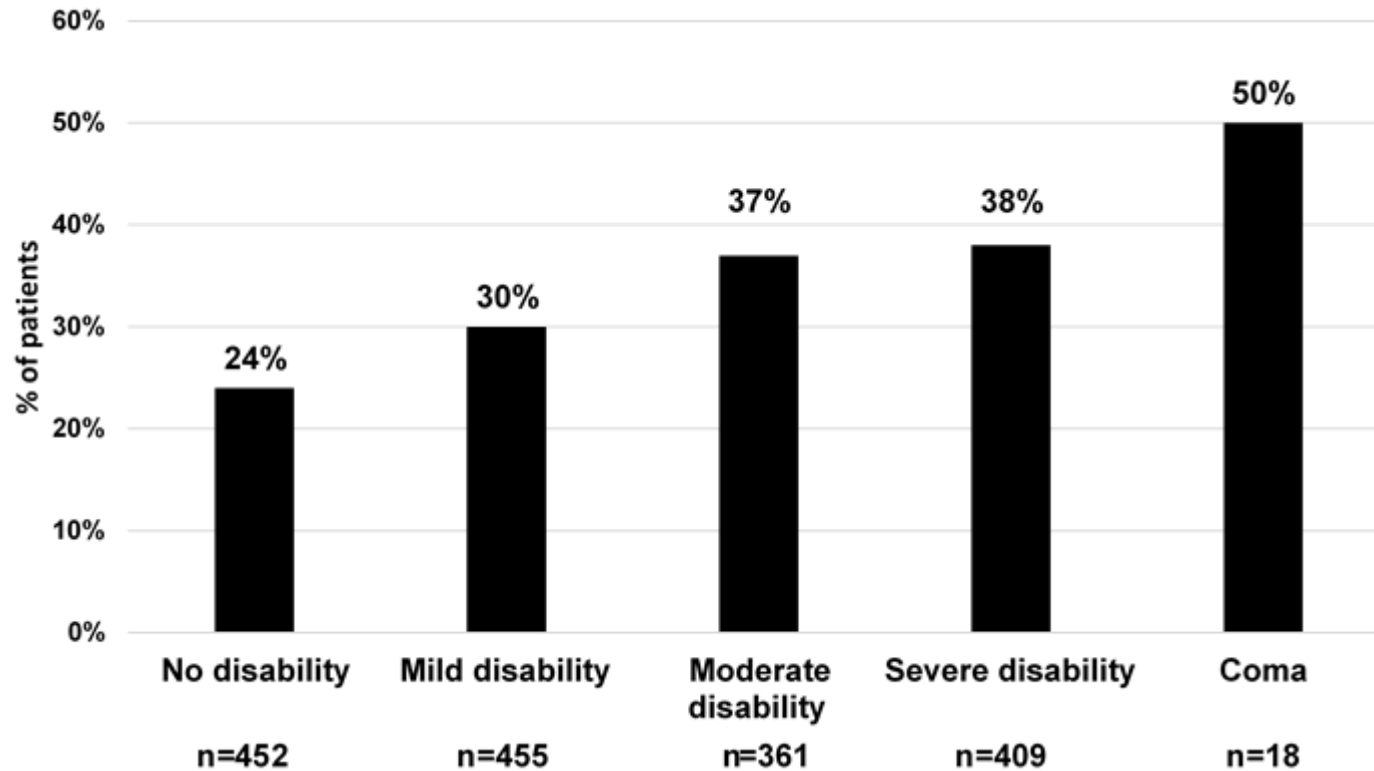

SDC 6: Patient Baseline Characteristics, separated by PT and OT-provided mobility

| Demographics                                               | All patient-days<br>n=1769 | PT-provided mobility<br>n=448 | No PT-provided mobility<br>n=1,321 | P value <sup>a</sup> | OT-provided mobility<br>n=401 | No OT-provided mobility<br>n=1,348 | P value <sup>a</sup> |
|------------------------------------------------------------|----------------------------|-------------------------------|------------------------------------|----------------------|-------------------------------|------------------------------------|----------------------|
| Age, n (%)                                                 |                            |                               |                                    |                      |                               |                                    |                      |
| 0 – 2 yrs                                                  | 1100 (62)                  | 223 (50)                      | 877 (66)                           | <0.001               | 231 (58)                      | 869 (64)                           | 0.17                 |
| 3 – 6 yrs                                                  | 196 (11)                   | 57 (13)                       | 139 (11)                           |                      | 44 (11)                       | 152 (11)                           |                      |
| 7 – 12 yrs                                                 | 220 (12)                   | 71 (16)                       | 149 (11)                           |                      | 59 (15)                       | 161 (12)                           |                      |
| 13 – 17 yrs                                                | 195 (11)                   | 73 (16)                       | 122 (9)                            |                      | 50 (13)                       | 145 (11)                           |                      |
| >18 yrs                                                    | 58 (3)                     | 24 (5)                        | 34 (3)                             |                      | 17 (4)                        | 41 (3)                             |                      |
| Female, n (%)                                              | 767 (43)                   | 180 (40)                      | 587 (44)                           | 0.26                 | 164 (41)                      | 603 (44)                           | 0.26                 |
| Ethnicity, n (%) <sup>b</sup>                              |                            |                               |                                    |                      |                               |                                    |                      |
| White                                                      | 864 (49)                   | 229 (51)                      | 635 (48)                           | 0.05                 | 224 (56)                      | 640 (47)                           | 0.02                 |
| Black                                                      | 397 (23)                   | 102 (23)                      | 295 (22)                           |                      | 78 (20)                       | 319 (23)                           |                      |
| Hispanic                                                   | 76 (4)                     | 26 (6)                        | 50 (4)                             |                      | 19 (5)                        | 57 (4)                             |                      |
| Asian                                                      | 295 (17)                   | 68 (15)                       | 227 (17)                           |                      | 58 (15)                       | 237 (17)                           |                      |
| Other                                                      | 130 (7)                    | 22 (5)                        | 108 (8)                            |                      | 22 (6)                        | 108 (8)                            |                      |
| BMI, median (IQR) <sup>b</sup>                             | 17 (15 – 20)               | 15 (15 – 21)                  | 17 (15 – 20)                       | <0.001               | 17 (15 – 21)                  | 18 (15 – 21)                       | 0.23                 |
| PICU LOS, median (IQR)                                     | 12 (6 – 30)                | 18 (8 – 41)                   | 11 (6 – 27)                        | <0.001               | 18 (8 – 41)                   | 11 (6 – 27)                        | <0.001               |
| Pre-admission function, n (%) <sup>c</sup>                 |                            |                               |                                    |                      |                               |                                    |                      |
| 1- Good                                                    | 455 (26)                   | 101 (23)                      | 354 (27)                           | <0.001               | 94 (23)                       | 361 (27)                           | <0.001               |
| 2- Mild disability                                         | 472 (27)                   | 127 (28)                      | 345 (26)                           |                      | 122 (30)                      | 350 (26)                           |                      |
| 3- Moderate disability                                     | 380 (22)                   | 113 (25)                      | 267 (20)                           |                      | 109 (27)                      | 271 (20)                           |                      |
| 4- Severe disability                                       | 442 (25)                   | 103 (23)                      | 339 (26)                           |                      | 75 (19)                       | 367 (27)                           |                      |
| 5- Coma/vegetative state                                   | 20 (1)                     | 4 (1)                         | 16 (1)                             |                      | 1 (0)                         | 19 (1)                             |                      |
| Ambulatory before admission, if age ≥3, n (%) <sup>a</sup> | 424 (63)                   | 176 (78)                      | 248 (56)                           | <0.001               | 136 (80)                      | 288 (58)                           | <0.001               |
| Primary admission reason, n (%) <sup>b</sup>               |                            |                               |                                    |                      |                               |                                    |                      |
| Surgical                                                   |                            |                               |                                    |                      |                               |                                    |                      |
| Cardiac                                                    | 274 (16)                   | 70 (16)                       | 204 (15)                           |                      | 60 (15)                       | 214 (16)                           |                      |
| Neurologic                                                 | 85 (5)                     | 34 (8)                        | 51 (4)                             |                      | 26 (7)                        | 59 (4)                             |                      |
| Orthopedic                                                 | 8 (1)                      | 4 (0)                         | 4 (1)                              |                      | 2 (1)                         | 6 (0)                              |                      |
| Other                                                      | 101 (6)                    | 26 (6)                        | 75 (6)                             |                      | 20 (5)                        | 81 (6)                             |                      |

|                                      |          |          |          |       |          |          |       |
|--------------------------------------|----------|----------|----------|-------|----------|----------|-------|
| Medical                              |          |          |          | 0.005 |          |          | 0.01  |
| Respiratory                          | 671 (38) | 145 (32) | 526 (40) |       | 126 (31) | 545 (40) |       |
| Cardiac                              | 282 (16) | 70 (16)  | 212 (16) |       | 71 (18)  | 211 (15) |       |
| Hematology-oncology                  | 40 (2)   | 14 (3)   | 26 (2)   |       | 14 (4)   | 26 (2)   |       |
| Infectious/inflammatory              | 104 (6)  | 27 (6)   | 77 (6)   |       | 23 (6)   | 81 (6)   |       |
| Neurologic                           | 103 (6)  | 31 (7)   | 72 (5)   |       | 29 (7)   | 74 (5)   |       |
| Other                                | 97 (5)   | 27 (6)   | 70 (5)   |       | 30 (8)   | 67 (5)   |       |
| Early mobility protocol <sup>d</sup> | 468 (26) | 134 (30) | 334 (25) | 0.06  | 132 (33) | 336 (25) | 0.001 |

Abbreviations: BMI, body mass index; IQR, interquartile range; LOS, length of stay; PT, physical therapy; PICU, pediatric intensive care unit

<sup>a</sup> Calculated using chi-squared test for categorical variables and Mann-Whitney U test for continuous variables.

<sup>b</sup> Missing data: ethnicity (n=7); body mass index (n=84); admission reason (n=6).

<sup>c</sup> Pediatric Cerebral Performance Category.

<sup>d</sup> Defined as unit-based guideline or policy for early mobility.



**SDC 7: Patient Clinical Characteristics on Study Day, separated by PT or OT-provided mobility**

| Clinical Characteristic on Study Day           | All<br>N = 1769 | PT-<br>provided<br>mobility<br>N = 448 | No PT-<br>provided<br>mobility<br>N = 1,321 | P-value <sup>a</sup> | OT-<br>provided<br>mobility<br>N = 401 | No OT-<br>provided<br>mobility<br>N = 1,348 | P-value <sup>a</sup> |
|------------------------------------------------|-----------------|----------------------------------------|---------------------------------------------|----------------------|----------------------------------------|---------------------------------------------|----------------------|
| Respiratory support, n (%) <sup>b</sup>        |                 |                                        |                                             |                      |                                        |                                             |                      |
| No support                                     | 312 (18)        | 99 (22)                                | 213 (16)                                    | <0.001               | 86 (22)                                | 226 (17)                                    | <0.001               |
| Nasal cannula or face mask                     | 166 (9)         | 55 (12)                                | 111 (8)                                     |                      | 54 (14)                                | 112 (8)                                     |                      |
| HFNC or RAM cannula                            | 209 (12)        | 53 (12)                                | 156 (12)                                    |                      | 47 (12)                                | 162 (12)                                    |                      |
| Tracheostomy collar                            | 38 (2)          | 13 (3)                                 | 25 (2)                                      |                      | 10 (3)                                 | 28 (2)                                      |                      |
| Mechanical ventilation–<br>noninvasive         | 167 (9)         | 39 (9)                                 | 128 (10)                                    |                      | 43 (11)                                | 124 (9)                                     |                      |
| Mechanical ventilation–<br>tracheostomy        | 260 (15)        | 78 (18)                                | 182 (14)                                    |                      | 65 (16)                                | 195 (14)                                    |                      |
| Mechanical ventilation–<br>endotracheal        | 611 (35)        | 110 (25)                               | 501 (38)                                    |                      | 95 (24)                                | 516 (39)                                    |                      |
| FiO <sub>2</sub> , median (IQR) <sup>b,c</sup> | 35 (28 – 50)    | 32 (25 – 45)                           | 35 (28 – 50)                                | 0.13                 | 30 (25 – 45)                           | 35 (30 – 50)                                | 0.06                 |
| GCS, median (IQR) <sup>b</sup>                 | 12 (9 – 15)     | 14 (9 – 15)                            | 11 (9 – 15)                                 | <0.001               | 14 (9 – 15)                            | 11 (9 – 15)                                 | 0.08                 |
| ≥1 sedative/analgesic infusion, n (%)          | 809 (46)        | 175 (39)                               | 634 (48)                                    | 0.001                | 155 (39)                               | 654 (48)                                    | 0.001                |
| Delirium present, n (%)                        |                 |                                        |                                             |                      |                                        |                                             |                      |
| No                                             | 453 (26)        | 124 (28)                               | 329 (25)                                    | 0.09                 | 118 (30)                               | 335 (25)                                    | 0.10                 |
| Yes                                            | 182 (10)        | 55 (12)                                | 127 (10)                                    |                      | 43 (11)                                | 139 (10)                                    |                      |
| Not available                                  | 1133 (64)       | 269 (60)                               | 864 (65)                                    |                      | 239 (60)                               | 894 (65)                                    |                      |
| Any vasoactive infusion, n (%) <sup>d</sup>    | 222 (13)        | 47 (11)                                | 175 (13)                                    | 0.13                 | 40 (10)                                | 182 (13)                                    | 0.08                 |
| Any physical restraint, n (%)                  | 249 (14)        | 52 (12)                                | 197 (15)                                    | 0.08                 | 48 (12)                                | 201 (15)                                    | 0.05                 |
| Any central venous catheter, n (%)             | 1189 (67)       | 311 (69)                               | 878 (67)                                    | 0.25                 | 278 (69)                               | 911 (67)                                    | 0.31                 |
| Arterial catheter, n (%)                       | 483 (27)        | 107 (24)                               | 376 (29)                                    | 0.06                 | 79 (20)                                | 404 (30)                                    | <0.001               |
| Hemodialysis catheter, n (%)                   | 84 (5)          | 31 (7)                                 | 53 (4)                                      | 0.01                 | 26 (7)                                 | 58 (4)                                      | 0.06                 |
| ECMO cannula, n (%)                            | 39 (2)          | 10 (2)                                 | 29 (2)                                      | 0.96                 | 7 (2)                                  | 32 (2)                                      | 0.48                 |
| Indwelling urinary catheter, n (%)             | 249 (14)        | 54 (12)                                | 195 (15)                                    | 0.15                 | 41 (10)                                | 208 (15)                                    | 0.01                 |
| Surgical drain, n (%)                          | 135 (8)         | 39 (9)                                 | 96 (7)                                      | 0.32                 | 37 (9)                                 | 98 (7)                                      | 0.17                 |
| Chest tube, n (%)                              | 194 (11)        | 52 (12)                                | 142 (11)                                    | 0.62                 | 34 (9)                                 | 160 (12)                                    | 0.07                 |
| Ventricular assist device, n (%)               | 16 (1)          | 5 (1)                                  | 11 (1)                                      | 0.58                 | 5 (1)                                  | 11 (1)                                      | 0.41                 |
| Intracranial pressure monitor, n (%)           | 50 (3)          | 18 (4)                                 | 32 (2)                                      | 0.08                 | 17 (4)                                 | 33 (2)                                      | 0.05                 |
| Presence of pressure ulcer(s)                  | 125 (7)         | 34 (8)                                 | 91 (7)                                      | 0.62                 | 25 (6)                                 | 100 (7)                                     | 0.46                 |

| <b>SDC 7, cont.</b>                         |                         |                                                  |                                                       |                            |                                                  |                                                       |                            |
|---------------------------------------------|-------------------------|--------------------------------------------------|-------------------------------------------------------|----------------------------|--------------------------------------------------|-------------------------------------------------------|----------------------------|
| <b>Clinical Characteristic on Study Day</b> | <b>All<br/>N = 1769</b> | <b>PT-<br/>provided<br/>mobility<br/>N = 448</b> | <b>No PT-<br/>provided<br/>mobility<br/>N = 1,321</b> | <b>P-value<sup>a</sup></b> | <b>OT-<br/>provided<br/>mobility<br/>N = 401</b> | <b>No OT-<br/>provided<br/>mobility<br/>N = 1,348</b> | <b>P-value<sup>a</sup></b> |
| Nurse:patient ratio, n (%) <sup>b</sup>     |                         |                                                  |                                                       |                            |                                                  |                                                       |                            |
| 2:1 or 1:1                                  | 733 (42)                | 158 (36)                                         | 575 (44)                                              | 0.003                      | 147 (37)                                         | 586 (43)                                              | 0.03                       |
| 1:2 or 1:3                                  | 1023 (58)               | 285 (64)                                         | 738 (56)                                              |                            | 251 (63)                                         | 772 (57)                                              |                            |
| Family present at bedside                   | 1315 (74)               | 353 (79)                                         | 962 (73)                                              | 0.01                       | 328 (82)                                         | 987 (72)                                              | <0.001                     |

Abbreviations: ECMO, extracorporeal membrane oxygenation; FiO<sub>2</sub>, fractional inspired oxygen concentration; GCS, Glasgow Coma Scale; HFNC, high-flow nasal cannula; IQR, interquartile range; PT, physical therapy.

<sup>a</sup> Calculated using chi-squared test and Mann-Whitney U test, as appropriate.

<sup>b</sup>Missing data: respiratory support (n=6); FiO<sub>2</sub> (n=2); GCS (n=3); nurse:patient ratio (n=13).

<sup>c</sup>Among patient-days with all types of respiratory support above nasal cannula or face mask (n=1291).

<sup>d</sup>Excluding milrinone

**SDC 8. Multivariable Adjusted Odds Ratios for PT and/or OT-provided mobility (primary outcome), with separate analyses for PT and OT**

|                                              | Any therapist-provided mobility<br>N=625 |         | PT-provided mobility<br>N=448     |         | OT –provided mobility<br>N=401    |         |
|----------------------------------------------|------------------------------------------|---------|-----------------------------------|---------|-----------------------------------|---------|
| Characteristic                               | Adjusted OR (95% CI) <sup>a</sup>        | P-value | Adjusted OR (95% CI) <sup>a</sup> | P-value | Adjusted OR (95% CI) <sup>a</sup> | P-Value |
| Age Category                                 |                                          |         |                                   |         |                                   |         |
| 0-2                                          | 1 (reference)                            |         | 1 (reference)                     |         | 1 (reference)                     |         |
| 3-6                                          | 1.42 (0.98-2.07)                         | 0.06    | 1.94 (1.31-2.87)                  | 0.001   | 1.37 (0.9-2.08)                   | 0.15    |
| 7-12                                         | 1.91 (1.34-2.73)                         | <0.001  | 2.45 (1.69-3.56)                  | <0.001  | 1.79 (1.21-2.66)                  | 0.004   |
| 13-17                                        | 2.10 (1.45-3.06)                         | <0.001  | 3.00 (2.06-4.43)                  | <0.001  | 1.60 (1.06-2.44)                  | 0.03    |
| >18                                          | 1.58 (0.83-2.98)                         | 0.16    | 2.98 (1.57-5.67)                  | <0.001  | 1.33 (0.66-2.67)                  | 0.43    |
| PICU day                                     |                                          |         |                                   |         |                                   |         |
| PICU days before day 100, per 10-fold change | 2.49 (1.85-3.45)                         | <0.001  | 2.09 (1.52-2.88)                  | <0.001  | 2.28 (1.64-3.18)                  | <0.001  |
| PICU days after day 100, per 10 fold change  | 0.51 (0.12-1.2)                          | 0.37    | 0.48 (0.11-2.23)                  | 0.35    | 0.83 (0.18-3.92)                  | 0.81    |
| Surgical admission                           | 1.21(0.93-1.58)                          | 0.15    | 1.37 (1.04-1.8)                   | 0.03    | 1.09 (0.81-1.45)                  | 0.57    |
| Female gender                                | 0.76 (0.61-0.95)                         | 0.018   | 0.80 (0.3-1.02)                   | 0.08    | 0.89 (0.69-1.14)                  | 0.35    |
| Respiratory support                          |                                          |         |                                   |         |                                   |         |
| None                                         | 1 (reference)                            |         | 1 (reference)                     |         | 1 (reference)                     |         |
| Nasal Cannula/Face mask                      | 1.46 (0.94-2.27)                         | 0.09    | 1.23 (0.79-1.96)                  | 0.35    | 1.61 (1.0-2.57)                   | 0.05    |
| HHFNC or RAM Cannula                         | 1.09 (0.71-1.69)                         | 0.69    | 1.05 (0.67-1.65)                  | 0.83    | 1.17 (0.73-1.89)                  | 0.51    |
| Trach collar                                 | 1.67 (0.76-3.69)                         | 0.2     | 1.36 (0.61-3.09)                  | 0.45    | 1.38 (0.57-3.34)                  | 0.47    |
| Mech vent-noninvasive                        | 1.12 (0.71-1.79)                         | 0.61    | 0.76 (0.46-1.24)                  | 0.27    | 1.33 (0.81-2.19)                  | 0.27    |
| Mech vent-tracheostomy                       | 1.34 (0.86-2.09)                         | 0.19    | 1.14 (0.72-1.81)                  | 0.57    | 1.23 (0.75-1.99)                  | 0.42    |
| Mech vent-endotracheal tube                  | 0.71 (0.47-1.08)                         | 0.11    | 0.61 (0.39-0.96)                  | 0.03    | 0.69 (0.43-1.1)                   | 0.12    |
| Baseline PCPC                                |                                          |         |                                   |         |                                   |         |
| No disability                                | 1 (reference)                            |         | 1 (reference)                     |         | 1 (reference)                     |         |
| Mild disability                              | 1.19 (0.89-1.65)                         | 0.31    | 1.2 (0.84-1.7)                    | 0.32    | 1.08 (0.75-1.56)                  | 0.67    |
| Moderate disability                          | 1.38 (1.04-2.06)                         | 0.03    | 1.33 (0.92-1.93)                  | 0.13    | 1.13 (0.77-1.66)                  | 0.53    |
| Severe disability                            | 0.74 (0.52-1.05)                         | 0.09    | 0.91 (0.62-1.34)                  | 0.646   | 0.54 (0.36-0.81)                  | 0.003   |
| Coma                                         | 0.32 (0.09-1.15)                         | 0.08    | 0.57 (0.17-1.98)                  | 0.38    | 0.12 (0.01-0.99)                  | 0.05    |

| <b>SDC 8. Therapist-provided mobility (cont.)</b> | <b>Any therapist-provided mobility</b>  |                | <b>PT-provided mobility<br/>N=448</b>   |                | <b>OT –provided mobility<br/>N=401</b>  |                |
|---------------------------------------------------|-----------------------------------------|----------------|-----------------------------------------|----------------|-----------------------------------------|----------------|
| <b>Characteristic</b>                             | <b>Adjusted OR (95% CI)<sup>a</sup></b> | <b>P-value</b> | <b>Adjusted OR (95% CI)<sup>a</sup></b> | <b>P-value</b> | <b>Adjusted OR (95% CI)<sup>a</sup></b> | <b>P-Value</b> |
| Vasoactive infusion <sup>b</sup>                  | 0.80 (0.55-1.20)                        | 0.29           | 0.80 (0.53-1.24)                        | 0.32           | 0.85 (0.54-1.34)                        | 0.49           |
| Benzodiazepine infusion                           | 0.92 (0.64-1.3)                         | 0.64           | 0.93 (0.63-1.38)                        | 0.71           | 0.98 (0.65-1.48)                        | 0.90           |
| Opioid infusion                                   | 1.06 (0.76-1.48)                        | 0.72           | 1.06 (0.74-1.52)                        | 0.77           | 0.92 (0.63-1.34)                        | 0.66           |
| Nurse:patient ratio 1:2 or 1:3                    | 1.32 (0.99-1.75)                        | 0.06           | 1.32 (0.98-1.77)                        | 0.07           | 1.10 (0.81-1.5)                         | 0.53           |
| Urinary bladder catheter                          | 0.98 (0.67-1.43)                        | 0.91           | 0.96 (0.64-1.44)                        | 0.84           | 0.88 (0.57-1.37)                        | 0.57           |
| Arterial or Central Venous Catheter               | 1.22 (0.93-1.63)                        | 0.15           | 1.28 (0.95-1.73)                        | 0.11           | 1.34 (0.97-1.84)                        | 0.07           |
| Hemodialysis catheter                             | 1.38 (0.81-2.33)                        | 0.23           | 1.42 (0.83-2.43)                        | 0.21           | 1.21 (0.68-2.14)                        | 0.52           |
| Intracranial pressure monitor                     | 2.25 (1.15-4.39)                        | 0.02           | 1.80 (0.91-3.57)                        | 0.09           | 1.72 (0.84-3.52)                        | 0.14           |
| Family presence                                   | 1.43 (1.08-1.89)                        | 0.01           | 1.15 (0.86-1.55)                        | 0.35           | 1.43 (1.04-2.58)                        | 0.03           |
| Unit mobility guideline/protocol                  | 1.58 (0.99-2.51)                        | 0.05           | 1.31 (0.88-1.94)                        | 0.18           | 1.64 (1.04-2.59)                        | 0.03           |

<sup>a</sup>Multivariable model includes random effect for site and is adjusted for ethnicity and all characteristics listed

<sup>b</sup>Any vasoactive not including milrinone

Abbreviations: HHFNC: Heated high flow nasal cannula; RAM: RAM cannula; mech vent: mechanical ventilation; PCPC: pediatric cerebral performance category

**SDC 9. Univariate and Multivariable Adjusted Odds Ratios for Out-of-Bed Mobility**

| Characteristic                                                | Crude OR<br>(95%CI) <sup>a</sup> | P-value | Adjusted OR<br>(95% CI) <sup>b</sup> | P-value |
|---------------------------------------------------------------|----------------------------------|---------|--------------------------------------|---------|
| Age                                                           |                                  |         |                                      |         |
| <3 years                                                      | 1 (reference)                    | -       | 1 (reference)                        | -       |
| ≥3 years                                                      | 0.77 (0.63-0.95)                 | 0.015   | 1.0 (0.56-1.8)                       | 0.99    |
| PICU day                                                      |                                  |         |                                      |         |
| PICU days before day 10, per 10-fold, comparing 10 vs 1 days  | 0.37 (0.18-0.75)                 | 0.006   | 0.52 (0.21-1.33)                     | 0.17    |
| PICU days after day 10, per 10-fold, comparing 100 vs 10 days | 1.74 (1.8-2.34)                  | 0.001   | 1.99 (1.3-3.0)                       | 0.001   |
| Respiratory support                                           |                                  |         |                                      |         |
| None                                                          | 1 (reference)                    | -       | 1 (reference)                        | -       |
| Nasal cannula/face mask                                       | 0.74 (0.48-1.15)                 | 0.18    | 0.78 (0.47-1.3)                      | 0.34    |
| HHFNC or RAM cannula                                          | 0.64 (0.43-0.97)                 | 0.03    | 0.60 (0.38-0.96)                     | 0.03    |
| Trach collar                                                  | 0.45 (0.22-0.95)                 | 0.035   | 0.42 (0.19-0.96)                     | 0.04    |
| Mech vent–noninvasive                                         | 0.48 (0.31-0.72)                 | 0.001   | 0.53 (0.32-0.87)                     | 0.01    |
| Mech vent–tracheostomy                                        | 0.30 (0.20-0.43)                 | <0.001  | 0.36 (0.22-0.56)                     | <0.001  |
| Mech vent–endotracheal tube                                   | 0.05 (0.04-0.08)                 | <0.001  | 0.13 (0.08-0.2)                      | <0.001  |
| Baseline PCPC                                                 |                                  |         |                                      |         |
| No disability                                                 | 1 (reference)                    | -       | 1 (reference)                        | -       |
| Mild disability                                               | 1.39 (1.05-1.84)                 | 0.02    | 1.45 (1.0-2.1)                       | 0.05    |
| Moderate disability                                           | 1.22 (0.91-1.64)                 | 0.19    | 1.08 (0.73-1.6)                      | 0.70    |
| Severe disability                                             | 0.73 (0.55-0.97)                 | 0.03    | 0.59 (0.40-0.87)                     | 0.007   |
| Coma                                                          | 0.39 (0.13-1.13)                 | 0.08    | 0.37 (0.11-1.3)                      | 0.11    |
| Vasoactive infusion <sup>c</sup>                              | 0.21 (0.159-0.30)                | <0.001  | 0.81 (0.49-1.3)                      | 0.39    |
| Benzodiazepine infusion                                       | 0.20 (0.15-0.28)                 | <0.001  | 0.97 (0.58-1.63)                     | 0.85    |
| Opioid infusion                                               | 0.16 (0.12-0.20)                 | <0.001  | 0.42 (0.24-0.73)                     | <0.001  |
| Nurse:patient ratio 1:2 or 1:3                                | 4.57 (3.59-5.81)                 | <0.001  | 1.82 (1.20-2.80)                     | 0.004   |
| Indwelling urinary catheter                                   | 0.11 (0.07-0.17)                 | <0.001  | 0.28 (0.14-0.57)                     | <0.001  |
| Arterial or central venous catheter                           | 0.32 (0.26-0.41)                 | <0.001  | 0.58 (0.38-0.89)                     | 0.006   |

| <b>SDC 9. Out of Bed Mobility (cont.)</b>   |                                         |                |                                 |                |
|---------------------------------------------|-----------------------------------------|----------------|---------------------------------|----------------|
| <b>Characteristic</b>                       | <b>Crude OR<br/>(95%CI)<sup>a</sup></b> | <b>P-value</b> | <b>aOR (95% CI)<sup>b</sup></b> | <b>P-value</b> |
| Chest tube                                  | 0.26 (0.18-0.38)                        | <0.001         | 0.49 (0.26-0.91)                | 0.01           |
| Hemodialysis catheter                       | 0.26 (0.15-0.47)                        | <0.001         | 0.30 (0.15-0.63)                | 0.001          |
| Intracranial pressure monitor               | 0.79 (0.44-1.44)                        | 0.44           | 0.56 (0.24-1.30)                | 0.18           |
| Unit mobility guideline/protocol            | 1.60 (1.17-2.28)                        | 0.003          | 1.73 (1.14-2.6)                 | 0.01           |
| Family presence <sup>d</sup>                |                                         |                |                                 |                |
| Age <3 years                                | 3.93 (2.9-5.34)                         | <0.001         | 4.55 (3.13-6.6)                 | <0.001         |
| Age ≥ 3 years                               | 2.03 (1.35-3.06)                        | 0.001          | 1.62 (0.98-2.7)                 | 0.06           |
| PT-OT involvement on study day <sup>e</sup> |                                         |                |                                 |                |
| Age<3 years                                 | 1.92 (1.46-2.52)                        | <0.001         | 1.43 (1.0-2.0)                  | 0.045          |
| Age≥3 years                                 | 2.61 (1.87-3.65)                        | <0.001         | 3.1 (2.01-4.79)                 | <0.001         |

Abbreviations: aOR, adjusted odds ratio; HHFNC, heated high-flow nasal cannula; mech vent, mechanical ventilation; OR, odds ratio; PCPC, Pediatric Cerebral Performance Category; RAM, RAM cannula.

<sup>a</sup>Crude estimates include random effect for site and no adjustment for any covariate.

<sup>b</sup>Adjusted estimate includes random effect for site, in addition to adjustment for admission reason and ethnicity and all variables listed in the table.

<sup>c</sup>Any vasoactive infusion, excluding milrinone.

<sup>d</sup>Interaction term for family presence by age strata in crude model ( $P=0.005$ ) and adjusted model ( $P=0.001$ ).

<sup>e</sup>Interaction term for PT-OT involvement by age strata in crude model ( $P=0.16$ ) and adjusted model ( $P=0.005$ ).

| <b>SDC 10. Frequency of Reported Barriers to Mobilization</b> |                |
|---------------------------------------------------------------|----------------|
| <b>Barrier</b>                                                | <b>No. (%)</b> |
| Medical contraindication*                                     | 154 (9)        |
| Circulation/heart*                                            | 154 (9)        |
| Too sedated*                                                  | 147 (8)        |
| Isolation precautions*                                        | 106 (6)        |
| Pain*                                                         | 91 (5)         |
| No physician order*                                           | 89 (5)         |
| Previously immobile*                                          | 74 (4)         |
| Post-op restriction*                                          | 67 (4)         |
| Patient not on unit*                                          | 52 (3)         |
| Bleeding risk*                                                | 52 (3)         |
| Mechanical ventilation                                        | 47 (3)         |
| Acquired neuromuscular weakness*                              | 45 (3)         |
| Presence of medical device*                                   | 40 (2)         |
| Contraindication from patient*                                | 40 (2)         |
| Extracorporeal membrane oxygenation*                          | 35 (2)         |
| Large catheter*                                               | 34 (2)         |
| Unable to schedule session                                    | 31 (2)         |
| Agitation                                                     | 29 (2)         |
| No nursing available*                                         | 26 (2)         |
| No therapist available*                                       | 25 (1)         |
| Delirium*                                                     | 23 (1)         |
| Terminal stage*                                               | 20 (1)         |
| Chemical paralysis                                            | 20 (1)         |
| Desaturates with activity                                     | 19 (1)         |
| Contraindication from parent*                                 | 17 (1)         |
| Intracranial pressure monitor                                 | 17 (1)         |
| Critical airway                                               | 14 (1)         |
| Bedrest orders                                                | 12 (1)         |
| Lack of equipment*                                            | 11 (1)         |

\*Pre-specified option for survey item "If there were mobilization barriers, please select all the barriers to mobilization."
